# Supplementary material for: Community Participation in Habitat Management and Larviciding for the Control of Malaria Vectors in Southern Malawi
Source: PubMed Central journal article supplement (PMC9833073; doi:10.4269/ajtmh.21-1127), 2022-11-21
Supplement: tpmd211127.SD1.pdf [file tpmd211127.SD1.pdf]

## Supplementary material

### Appendix A: Spin-the-bottle method for selecting larval habitats

**Eligible habitats:** any habitat the LSM committee is spraying with *Bti*, and which has a minimum depth along at least part of the edge that is less than 30cm.

#### Selection of Habitat 1

- Start at center of village.
- Spin a glass bottle on the ground.
- The first habitat (which the LSM committee is spraying with *Bti*) in the direction the bottle is pointing is Habitat 1 for larval density sampling.
- The habitat does not have to be a minimum distance from the center of the village.
- If there isn't a habitat (which the LSM committee is spraying with *Bti*) in that direction, spin the bottle again at the center of the village.

#### Selection of Habitat 2

- At location of Habitat 1, spin a glass bottle on the ground.
- The first habitat in the direction the bottle is pointing, *farther than 50m from Habitat 1*, is Habitat 2 for larval density sampling.
- If there isn't a habitat (which the LSM committee is spraying with *Bti*) in that direction farther than 50m from Habitat 1, then spin the bottle again at the location of Habitat 1.
- If there isn't a habitat (which the LSM committee is spraying with *Bti*) farther than 50m in any direction, then the first habitat in the direction the bottle is pointing is Habitat 2.

#### Selection of Habitat 3

- At location of Habitat 2, spin a glass bottle on the ground.
- The first habitat in the direction the bottle is pointing, *farther than 50m from the both Habitat 1 and Habitat 2*, is Habitat 3 for larval density sampling.

- If there isn't a habitat (which the LSM committee is spraying with *Bti*) in that direction farther than 50m from Habitat 1 and Habitat 2, then spin the bottle again at the location of Habitat 2.
- If there isn't a habitat (which the LSM committee is spraying with *Bti*) farther than 50m in any direction, then the first habitat in the direction the bottle is pointing is Habitat 3.

Note: If there are only 3 habitats, or fewer, sample at all of them. There would be no need for random selection in this case.

**Appendix B:** Semi-structured questionnaire for participants in the LSM arm of the study (English version)

|                                                  |
|--------------------------------------------------|
| <b>Village:</b>                                  |
| <b>Demographic Features</b>                      |
| Age (years)                                      |
| 18-25                                            |
| 26 - 40                                          |
| 41 - 64                                          |
| 65+                                              |
| <b>Gender</b>                                    |
| Male                                             |
| Female                                           |
| <b>Education</b>                                 |
| Illiterate                                       |
| Primary                                          |
| Secondary                                        |
| Graduate & above                                 |
| <b>Main Source of Income</b>                     |
| Employed                                         |
| Agriculture                                      |
| Business                                         |
| Manual labour                                    |
| None                                             |
| <b>Knowledge of Malaria, Spread and Symptoms</b> |

|                                                                         |
|-------------------------------------------------------------------------|
| Do you have any knowledge of malaria?                                   |
| Yes                                                                     |
| No                                                                      |
| Have you ever suffered from malaria? (diagnosed malaria)                |
| Yes                                                                     |
| No                                                                      |
| Has anybody you know ever suffered from malaria? (diagnosed malaria)    |
| Yes                                                                     |
| No                                                                      |
| What are the common symptoms of malaria? (multiple choice)              |
| Fever                                                                   |
| Nausea                                                                  |
| Headache                                                                |
| Body aches                                                              |
| Vomiting                                                                |
| Shivering                                                               |
| Diarrhea                                                                |
| What are the common symptoms of malaria? (multiple choice)              |
| Convulsion                                                              |
| No idea                                                                 |
| Who do you perceive to be the most at risk for malaria? (open question) |
| In your opinion, how do people get malaria?                             |
| Mosquito bite                                                           |
| Fly bite                                                                |
| Witchcraft                                                              |

|                                                                                   |
|-----------------------------------------------------------------------------------|
| Soaking in rain                                                                   |
| Other (specify)                                                                   |
| No idea                                                                           |
| <b>Knowledge about malaria control</b>                                            |
| Do you think it is possible to control mosquitoes?                                |
| Yes                                                                               |
| No                                                                                |
| If yes, how do you think mosquitoes can be controlled? (multiple choice)          |
| Smoke                                                                             |
| Mosquito coils                                                                    |
| Mosquito spray                                                                    |
| Fan                                                                               |
| Covering of body with clothes                                                     |
| Mosquito net                                                                      |
| Skin repellents                                                                   |
| Cleaning house                                                                    |
| Indoor Residual spraying                                                          |
| Removing standing water                                                           |
| Clearing of bushes                                                                |
| Other (specify)                                                                   |
| No idea                                                                           |
| If no, why do you think it is not possible to control mosquitoes? (open question) |
| What is the name of the malaria vector?                                           |
| Female Anopheles                                                                  |
| Male Anopheles                                                                    |

|                                                                                       |
|---------------------------------------------------------------------------------------|
| <i>Culex</i>                                                                          |
| Other (specify)                                                                       |
| No idea                                                                               |
| <b>Knowledge about mosquito larvae</b>                                                |
| Are you able to recognise mosquito larvae?                                            |
| Yes                                                                                   |
| No                                                                                    |
|                                                                                       |
| If yes, are you able to distinguish anopheline larvae from culicine?                  |
| Yes                                                                                   |
| No                                                                                    |
| <b>Knowledge about mosquito breeding</b>                                              |
| In what type of environment do anopheline mosquitoes like to breed? (multiple choice) |
| Running dirty water                                                                   |
| Garbage/Trash                                                                         |
| Standing clean water                                                                  |
| Standing dirty water                                                                  |
| Running Clean water                                                                   |
| Plants/ vegetation                                                                    |
| Other (specify)                                                                       |
| No idea                                                                               |
| What are common aquatic habitats for anopheline mosquitoes? (multiple choice)         |
| Pit-latrine                                                                           |
| Rice paddies                                                                          |
| Wells                                                                                 |

|                                                                                                                                                                       |
|-----------------------------------------------------------------------------------------------------------------------------------------------------------------------|
| Drainage Channels                                                                                                                                                     |
| Bore hole run-offs                                                                                                                                                    |
| Dams                                                                                                                                                                  |
| Stream Beds                                                                                                                                                           |
| Freshwater marshes                                                                                                                                                    |
| Tire tracks                                                                                                                                                           |
| Brick pits                                                                                                                                                            |
| Hoof print aggregations                                                                                                                                               |
| Ponds                                                                                                                                                                 |
| Rain Pools                                                                                                                                                            |
| Run-offs from natural sources                                                                                                                                         |
| Other (specify)                                                                                                                                                       |
|                                                                                                                                                                       |
| <i>[Explanation of the correct breeding habitats of anophelines by the research assistant: E.g. clean standing water in sites like borehole run-offs, wells, etc]</i> |
| <b>Creation and importance of mosquito breeding sites</b>                                                                                                             |
| Do you think that these aquatic habitats are important for your livelihood?                                                                                           |
| Yes                                                                                                                                                                   |
| No                                                                                                                                                                    |
| Why do you think that these aquatic habitats are important for your livelihood? (open question)                                                                       |
| Do you create these sites yourself?                                                                                                                                   |
| Yes                                                                                                                                                                   |
| No                                                                                                                                                                    |
| For what purposes do you create these sites? (open question)                                                                                                          |

| <b>Knowledge about mosquito larval control methods</b>     |  |
|------------------------------------------------------------|--|
| Eradication of breeding site of mosquito (multiple choice) |  |
| Draining                                                   |  |
| Filling up                                                 |  |
| Changing water in storage tanks                            |  |
| Others (specify)                                           |  |
| No idea                                                    |  |
| Are you aware of <i>Bti</i> larviciding?                   |  |
| Yes                                                        |  |
| No                                                         |  |
| Negative effects of <i>Bti</i> on spray operators          |  |
| Many                                                       |  |
| Few                                                        |  |
| None                                                       |  |
| No idea                                                    |  |
| Negative effects of <i>Bti</i> on livestock                |  |
| Many                                                       |  |
| Few                                                        |  |
| None                                                       |  |
| No idea                                                    |  |
| Negative effects of <i>Bti</i> on crops                    |  |
| Many                                                       |  |
| Few                                                        |  |
| None                                                       |  |



|                                                                  |
|------------------------------------------------------------------|
| No idea                                                          |
| Negative effects of <i>Bti</i> on crop consumers and water users |
| Many                                                             |
| Few                                                              |
| None                                                             |
| No idea                                                          |
| Participation in LSM activities (Draining & filling)             |
| Active                                                           |
| Less active                                                      |
| Not at All                                                       |
| Motivation in LSM activities (Draining & filling)                |
| A lot                                                            |
| Little                                                           |
| None                                                             |
| <b>for LSM Committee members only</b>                            |
| Participation in <i>Bti</i> spraying                             |
| Active                                                           |
| Less Active                                                      |
| Not at All                                                       |
| Motivation in <i>Bti</i> spraying                                |
| A lot                                                            |
| Little                                                           |
| None                                                             |
